# Supplementary material for: WEGO 2.0: a web tool for analyzing and plotting GO annotations, 2018 update
Source: PubMed Central journal article supplement — Nucleic Acids Res. 2018 May 18;46(Web Server issue):W71–5. doi: 10.1093/nar/gky400 (PMC6030983; doi:10.1093/nar/gky400), 2018-05-18
Supplement: gky400_supplemental_table.pdf [file gky400_supplemental_table.pdf]

## Application of Chi-Square test in WEGO 2.0

Suppose we have 3 valid input files from samples s1, s2 and s3. To test if there is a sample difference in gene enrichments involved in biological process, WEGO constructed a contingency table of 3×2 (see Table 1) separating the genes by samples or annotated as GO terms of biological process.

If  $O_{ij}$  is the observed number and  $E_{ij}$  is the expected number of genes corresponding to the  $j^{\text{th}}$  sample and the  $i^{\text{th}}$  condition (whether annotated as GO terms), then chi-square is:

$$\chi^2 = \sum_i \sum_j \frac{(O_{ij} - E_{ij})^2}{E_{ij}} \quad (1),$$

where  $E_{ij}$  is obtained as  $E_{ij} = \frac{R_i \times C_j}{TotalSum}$  (2).

Table 1 Example of contingency table of 3 input samples

|                           | <b>s1</b>  | <b>s2</b>  | <b>d3</b>  | <b>Total</b>                              |
|---------------------------|------------|------------|------------|-------------------------------------------|
| In biological process     | g11        | g12        | g13        | R1=g11+g12+g13                            |
| Not in biological process | g21        | g22        | g23        | R2=g21+g22+g23                            |
| Total                     | C1=g11+g21 | C2=g12+g22 | C3=g13+g23 | Total Sum=<br>g11+g12+g13+<br>g21+g22+g23 |

The P-value is obtained when projecting the value of chi-square to the chi-square distribution with 2 degrees of freedom.
